# Supplementary material for: A Multi-Gene Panel to Identify Lipedema-Predisposing Genetic Variants by a Next-Generation Sequencing Strategy
Source: MDPI journal article supplement (doi:10.3390/jpm12020268), 2022-02-11
Supplement: s1 [file s1]

| Subpanel                                       | Gene            | OMIM gene ID | Disease/Mouse model/Cellular function             | OMIM disease ID    | Reference/GeneCards link/MGI ID (if not in OMIM) |
|------------------------------------------------|-----------------|--------------|---------------------------------------------------|--------------------|--------------------------------------------------|
| Isolated lipedema                              | <i>AKR1C1</i>   | *600449      | Lipedema                                          | /                  | doi:10.3390/ijms21176264                         |
| Syndromic subcutaneous fat tissue accumulation | <i>ALDH18A1</i> | *138250      | Cutis laxa, fat pads and retinopathy              | /                  | doi:10.1016/j.ejpn.2014.01.003                   |
|                                                | <i>NSD1</i>     | *606681      | Sotos syndrome with diabetes, asthma, lipedema    | /                  | doi:10.1016/j.ejmg.2009.06.001                   |
|                                                | <i>POU1F1</i>   | *173110      | Combined pituitary deficiency and lipedema        | /                  | doi:10.1055/s-0029-1224154                       |
|                                                | <i>TBL1XR1</i>  | *608628      | Pierpont syndrome                                 | #602342            |                                                  |
| Differential diagnosis                         | <i>ADCY3</i>    | *600291      | Severe obesity                                    | /                  | doi:10.1038/s41588-017-0023-6                    |
|                                                | <i>AKT2</i>     | *164731      | <i>AKT2</i> -linked lipodystrophy                 | /                  | doi:10.1016/j.ecl.2017.01.012                    |
|                                                | <i>ADRA2A</i>   | *104210      | Atypical familial partial lipodystrophy           | /                  | doi:10.1172/jci.insight.86870                    |
|                                                | <i>AGPAT2</i>   | *603100      | FPLD1                                             | #608594            |                                                  |
|                                                | <i>CAV1</i>     | *601047      | FPLD7                                             | #606721            |                                                  |
|                                                | <i>CIDEA</i>    | *612120      | FPLD5                                             | #615238            |                                                  |
|                                                | <i>LIPE</i>     | *151750      | FPLD6                                             | #615980            |                                                  |
|                                                | <i>LMNA</i>     | *150330      | FPLD2                                             | #151660            |                                                  |
|                                                | <i>MFN2</i>     | *608507      | <i>MFN2</i> -associated lipomatosis               | /                  | doi:10.1016/j.jacl.2018.07.009                   |
|                                                | <i>PALB2</i>    | *610355      | Familial multiple subcutaneous lipomatosis        | /                  | doi:10.1016/j.hemonc.2016.01.001                 |
|                                                | <i>PLIN1</i>    | *170290      | FPLD4                                             | #613877            |                                                  |
|                                                | <i>PPARG</i>    | *601487      | FPLD3<br>Obesity, severe                          | #604367<br>#601665 |                                                  |
|                                                | <i>CCBE1</i>    | *612753      | HKLLS1                                            | #235510            |                                                  |
|                                                | <i>FLT4</i>     | *136352      | LMPHM1                                            | #153100            |                                                  |
|                                                | <i>FOXC2</i>    | *602402      | LPHDST                                            | #153400            |                                                  |
|                                                | <i>GATA2</i>    | *137295      | Primary lymphedema with myelodysplasia            | #614038            |                                                  |
|                                                | <i>GJA1</i>     | *121014      | Oculodentodigital syndrome and primary lymphedema | /                  | doi:10.1111/cge.12158                            |

|  |                |         |                                                                    |                                          |                                |
|--|----------------|---------|--------------------------------------------------------------------|------------------------------------------|--------------------------------|
|  | <i>HGF</i>     | *142409 | Primary lymphedema                                                 | /                                        | doi:10.1089/lrb.2008.1524      |
|  | <i>ALMS1</i>   | *606844 | ALMS                                                               | #203800                                  |                                |
|  | <i>ARL6</i>    | *608845 | BBS3                                                               | #600151                                  |                                |
|  | <i>BBIP1</i>   | *613605 | BBS18                                                              | #615995                                  |                                |
|  | <i>BBS1</i>    | *209901 | BBS1                                                               | #209900                                  |                                |
|  | <i>BBS10</i>   | *610148 | BBS10                                                              | #615987                                  |                                |
|  | <i>BBS12</i>   | *610683 | BBS12                                                              | #615989                                  |                                |
|  | <i>BBS2</i>    | *606151 | BBS2                                                               | #615981                                  |                                |
|  | <i>BBS4</i>    | *600374 | BBS4                                                               | #615982                                  |                                |
|  | <i>BBS5</i>    | *603650 | BBS5                                                               | #615983                                  |                                |
|  | <i>BBS7</i>    | *607590 | BBS7                                                               | #615984                                  |                                |
|  | <i>PTHB1</i>   | *607968 | BBS9                                                               | #615986                                  |                                |
|  | <i>C8orf37</i> | *614477 | BBS21                                                              | #617406                                  |                                |
|  | <i>CEP19</i>   | *615586 | Morbid obesity and spermatogenic failure                           | #615703                                  |                                |
|  | <i>CEP290</i>  | *610142 | BBS14                                                              | #615991                                  |                                |
|  | <i>DYRK1B</i>  | *604556 | Abdominal obesity-metabolic syndrome 3                             | #615812                                  |                                |
|  | <i>GNAS</i>    | *139320 | PHP1A<br>PHP1B<br>PHP1C<br>pseudoPHP                               | #103580<br>#603233<br>#612462<br>#612463 |                                |
|  | <i>HDAC8</i>   | *300269 | CDLS5                                                              | #300882                                  |                                |
|  | <i>IFT172</i>  | *607386 | BBS20                                                              | #619471                                  |                                |
|  | <i>IFT27</i>   | *615870 | BBS19                                                              | #615996                                  |                                |
|  | <i>INPP5E</i>  | *613037 | Mental retardation, truncal obesity, retinal dystrophy, micropenis | #610156                                  |                                |
|  | <i>INSR</i>    | *147670 | HHF5                                                               | #609968                                  |                                |
|  | <i>KSR2</i>    | *610737 | Obesity, insulin resistance, impaired cellular fuel oxidation      | /                                        | doi:10.1016/j.cell.2013.09.058 |
|  | <i>LEP</i>     | *164160 | Morbid obesity                                                     | #614962                                  |                                |
|  | <i>LEPR</i>    | *601007 | Morbid obesity                                                     | #614963                                  |                                |
|  | <i>LZTFL1</i>  | *606568 | BBS17                                                              | #615994                                  |                                |
|  | <i>MC3R</i>    | *155540 | Non-syndromic early-onset obesity                                  | /                                        | doi:10.1038/s41366-019-0357-5  |
|  | <i>MC4R</i>    | *155541 | Obesity                                                            | #618406                                  |                                |

|                 |                |         |                                                |         |                                                                                                                                                                       |
|-----------------|----------------|---------|------------------------------------------------|---------|-----------------------------------------------------------------------------------------------------------------------------------------------------------------------|
|                 | <i>MEGF8</i>   | *604267 | CRPT2                                          | #614976 |                                                                                                                                                                       |
|                 | <i>MKKS</i>    | *604896 | BBS6                                           | #605231 |                                                                                                                                                                       |
|                 | <i>MKS1</i>    | *609883 | BBS13                                          | #615990 |                                                                                                                                                                       |
|                 | <i>NR0B2</i>   | *604630 | Early-onset mild obesity                       | #601665 |                                                                                                                                                                       |
|                 | <i>PCSK1</i>   | *162150 | Obesity with impaired prohormone processing    | #600955 |                                                                                                                                                                       |
|                 | <i>PHF6</i>    | *300414 | BFLS                                           | #301900 |                                                                                                                                                                       |
|                 | <i>POMC</i>    | *176830 | Obesity, adrenal insufficiency, red hair       | #609734 |                                                                                                                                                                       |
|                 | <i>PPP1R3A</i> | *600917 | Severe insulin resistance                      | #125853 |                                                                                                                                                                       |
|                 | <i>RAB23</i>   | *606144 | CRPT1                                          | #201000 |                                                                                                                                                                       |
|                 | <i>SDCCAG8</i> | *613524 | BBS16                                          | #615993 |                                                                                                                                                                       |
|                 | <i>SH2B1</i>   | *608937 | Severe early-onset obesity                     | /       | doi:10.1172/JCI62696                                                                                                                                                  |
|                 | <i>SIM1</i>    | *603128 | Obesity                                        | /       | doi:10.1007/s11695-019-04184-w                                                                                                                                        |
|                 | <i>TRIM32</i>  | *602290 | BBS11                                          | #615988 |                                                                                                                                                                       |
|                 | <i>TTC8</i>    | *608132 | BBS8                                           | #615985 |                                                                                                                                                                       |
|                 | <i>VPS13B</i>  | *607817 | Cohen syndrome                                 | #216550 |                                                                                                                                                                       |
| Candidate genes | <i>WDPCP</i>   | *613580 | BBS15                                          | #615992 |                                                                                                                                                                       |
|                 | <i>A2M</i>     | *103950 | Inflammatory cytokines inhibitor               | /       | doi:10.1152/ajpregu.00335.2014                                                                                                                                        |
|                 | <i>ABCC6</i>   | *603234 | Pseudoxanthoma elasticum                       | #264800 |                                                                                                                                                                       |
|                 | <i>ABCG1</i>   | *603076 | Cellular lipid homeostasis regulation          | /       | <a href="https://www.genecards.org/cgi-bin/carddisp.pl?gene=ABCG1&amp;keywords=ABCG1">https://www.genecards.org/cgi-bin/carddisp.pl?gene=ABCG1&amp;keywords=ABCG1</a> |
|                 | <i>ACBD7</i>   | /       | Medium- and long-chain acyl-CoA esters binding | /       | <a href="https://www.genecards.org/cgi-bin/carddisp.pl?gene=ACBD7&amp;keywords=ACBD7">https://www.genecards.org/cgi-bin/carddisp.pl?gene=ACBD7&amp;keywords=ACBD7</a> |
|                 | <i>ACSL1</i>   | *152425 | Increased body fat mass                        | /       | MGI:102797                                                                                                                                                            |
|                 | <i>ACVR1C</i>  | *608981 | Body fat distribution                          | /       | doi:10.1210/clinem/dgab877                                                                                                                                            |
|                 | <i>ADIG</i>    | *611396 | Abnormal adipose tissue development            | /       | MGI:2675492                                                                                                                                                           |
|                 | <i>ADIPOQ</i>  | *605441 | Adiponectin deficiency                         | #612556 |                                                                                                                                                                       |
|                 | <i>ADRB2</i>   | +109690 | Obesity, type 2 diabetes                       | /       | <a href="https://www.genecards.org/cgi-bin/carddisp.pl?gene=ADRB2&amp;keywords=ADRB2">https://www.genecards.org/cgi-bin/carddisp.pl?gene=ADRB2&amp;keywords=ADRB2</a> |
|                 | <i>ADRB3</i>   | *109691 | Increased total body fat amount                | /       | MGI:87939                                                                                                                                                             |
|                 | <i>AEBP1</i>   | *602981 | Abnormal fat cell morphology                   | /       | MGI:1197012                                                                                                                                                           |
|                 | <i>AGRP</i>    | *602311 | Abnormal energy expenditure                    | /       | MGI:892013                                                                                                                                                            |
|                 | <i>AKR1B1</i>  | *103880 | Steroid hormones metabolism                    | /       | <a href="https://www.genecards.org/cgi-">https://www.genecards.org/cgi-</a>                                                                                           |

|  |                |         |                                                                       |   |                                                                                                                                                                               |
|--|----------------|---------|-----------------------------------------------------------------------|---|-------------------------------------------------------------------------------------------------------------------------------------------------------------------------------|
|  |                |         |                                                                       |   | <a href="#">bin/carddisp.pl?gene=AKR1B1&amp;keywords=AKR1B1</a>                                                                                                               |
|  | <i>AKR1B10</i> | *604707 | Detoxification of dietary and lipid-derived unsaturated carbonyls     | / | <a href="https://www.genecards.org/cgi-bin/carddisp.pl?gene=AKR1B10&amp;keywords=AKR1B10">https://www.genecards.org/cgi-bin/carddisp.pl?gene=AKR1B10&amp;keywords=AKR1B10</a> |
|  | <i>AKR1B15</i> | *616336 | Steroid hormones metabolism                                           | / | <a href="https://www.genecards.org/cgi-bin/carddisp.pl?gene=AKR1B15&amp;keywords=AKR1B15">https://www.genecards.org/cgi-bin/carddisp.pl?gene=AKR1B15&amp;keywords=AKR1B15</a> |
|  | <i>AKR1C2</i>  | *600450 | Regulation of estrogens and androgens metabolism                      | / | <a href="https://www.genecards.org/cgi-bin/carddisp.pl?gene=AKR1C2&amp;keywords=AKR1C2">https://www.genecards.org/cgi-bin/carddisp.pl?gene=AKR1C2&amp;keywords=AKR1C2</a>     |
|  | <i>AKR1C3</i>  | *603966 | Steroid hormones metabolism                                           | / | <a href="https://www.genecards.org/cgi-bin/carddisp.pl?gene=AKR1C3&amp;keywords=AKR1C3">https://www.genecards.org/cgi-bin/carddisp.pl?gene=AKR1C3&amp;keywords=AKR1C3</a>     |
|  | <i>AKR1C4</i>  | *600451 | Steroid hormones metabolism                                           | / | <a href="https://www.genecards.org/cgi-bin/carddisp.pl?gene=AKR1C4&amp;keywords=AKR1C4">https://www.genecards.org/cgi-bin/carddisp.pl?gene=AKR1C4&amp;keywords=AKR1C4</a>     |
|  | <i>AKR1E2</i>  | *617451 | Steroid hormones metabolism                                           | / | <a href="https://www.genecards.org/cgi-bin/carddisp.pl?gene=AKR1E2&amp;keywords=AKR1E2">https://www.genecards.org/cgi-bin/carddisp.pl?gene=AKR1E2&amp;keywords=AKR1E2</a>     |
|  | <i>ANGPTL4</i> | *605910 | Abnormal lipid homeostasis<br>Abnormal lymphatic vessel morphology    | / | MGI:1888999                                                                                                                                                                   |
|  | <i>ANK2</i>    | *106410 | Increased fat cell size                                               | / | MGI:88025                                                                                                                                                                     |
|  | <i>ANKRD26</i> | *610855 | Regulator of adipogenesis and feeding behavior                        | / | <a href="https://www.genecards.org/cgi-bin/carddisp.pl?gene=ANKRD26&amp;keywords=ANKRD26">https://www.genecards.org/cgi-bin/carddisp.pl?gene=ANKRD26&amp;keywords=ANKRD26</a> |
|  | <i>ANXA1</i>   | *151690 | Abnormal adipose tissue morphology and physiology                     | / | MGI:96819                                                                                                                                                                     |
|  | <i>APOA1</i>   | *107680 | Promotion of cholesterol efflux from tissues                          | / | <a href="https://www.genecards.org/cgi-bin/carddisp.pl?gene=APOA1&amp;keywords=APOA1">https://www.genecards.org/cgi-bin/carddisp.pl?gene=APOA1&amp;keywords=APOA1</a>         |
|  | <i>APOE</i>    | *107741 | Lipid transport between organs via the plasma and interstitial fluids | / | <a href="https://www.genecards.org/cgi-bin/carddisp.pl?gene=APOE&amp;keywords=APOE">https://www.genecards.org/cgi-bin/carddisp.pl?gene=APOE&amp;keywords=APOE</a>             |
|  | <i>ARNTL</i>   | *602550 | Dyslipidemia, ectopic fat formation, altered energy homeostasis       | / | MGI:1096381                                                                                                                                                                   |
|  | <i>ARRDC3</i>  | *612464 | Body mass and energy expenditure regulation                           | / | doi:10.1016/j.cmet.2011.08.011                                                                                                                                                |
|  | <i>ATG12</i>   | *609608 | Increased body fat mass                                               | / | MGI:1914776                                                                                                                                                                   |
|  | <i>ATXN1</i>   | *601556 | Association with ectopic-fat                                          | / | doi: 10.1038/ng.3738                                                                                                                                                          |
|  | <i>BAIAP3</i>  | *604009 | Behavior and food intake regulation                                   | / | <a href="https://www.genecards.org/cgi-bin/carddisp.pl?gene=BAIAP3&amp;keywords=BAIAP3">https://www.genecards.org/cgi-bin/carddisp.pl?gene=BAIAP3&amp;keywords=BAIAP3</a>     |
|  | <i>BDNF</i>    | *113505 | Body weight gain                                                      | / | doi:10.1007/s11064-021-03523-7                                                                                                                                                |

|                |         |                                                                                                                |         |                                                                                                                                                                               |
|----------------|---------|----------------------------------------------------------------------------------------------------------------|---------|-------------------------------------------------------------------------------------------------------------------------------------------------------------------------------|
| <i>BECN2</i>   | *615687 | Increased body weight                                                                                          | /       | MGI:2684950                                                                                                                                                                   |
| <i>BRD2</i>    | *601540 | Increased total body fat amount                                                                                | /       | MGI:99495                                                                                                                                                                     |
| <i>BRS3</i>    | *300107 | Regulation of metabolic rate, glucose metabolism                                                               | /       | <a href="https://www.genecards.org/cgi-bin/carddisp.pl?gene=BRS3&amp;keywords=BRS3">https://www.genecards.org/cgi-bin/carddisp.pl?gene=BRS3&amp;keywords=BRS3</a>             |
| <i>BSCL2</i>   | *606158 | CGL2                                                                                                           | #269700 |                                                                                                                                                                               |
| <i>CADM2</i>   | *609938 | Obesity                                                                                                        | /       | doi:10.1038/s41598-019-43861-9                                                                                                                                                |
| <i>CAMKK2</i>  | *615002 | Increased percent body fat/body weight                                                                         | /       | MGI:2444812                                                                                                                                                                   |
| <i>CARTPT</i>  | *602606 | Susceptibility to obesity                                                                                      | #601665 |                                                                                                                                                                               |
| <i>CAVIN1</i>  | *603198 | CGL4                                                                                                           | #613327 |                                                                                                                                                                               |
| <i>CD300E</i>  | *609801 | Neutrophil-mediated inflammation in adipose tissue                                                             | /       | doi:10.1371/journal.pone.0125718                                                                                                                                              |
| <i>CDKN1A</i>  | *116899 | Increased white fat cell number                                                                                | /       | MGI:104556                                                                                                                                                                    |
| <i>CDKN1B</i>  | *600778 | Increased white fat cell number                                                                                | /       | MGI:104565                                                                                                                                                                    |
| <i>CIDEA</i>   | *604440 | Role in thermogenesis and lipolysis                                                                            | /       | <a href="https://www.genecards.org/cgi-bin/carddisp.pl?gene=CIDEA&amp;keywords=CIDEA">https://www.genecards.org/cgi-bin/carddisp.pl?gene=CIDEA&amp;keywords=CIDEA</a>         |
| <i>CLOCK</i>   | *601851 | Increased body weight                                                                                          | /       | MGI:99698                                                                                                                                                                     |
| <i>CNR1</i>    | *114610 | Role in diet-induced obesity, dyslipidemia, liver steatosis, lipogenesis, energy expenditure, feeding behavior | /       | <a href="https://www.genecards.org/cgi-bin/carddisp.pl?gene=CNR1&amp;keywords=CNR1">https://www.genecards.org/cgi-bin/carddisp.pl?gene=CNR1&amp;keywords=CNR1</a>             |
| <i>CNTNAP2</i> | *604569 | Diet-induced obesity.                                                                                          | /       | doi:10.1007/s00335-012-9400-8                                                                                                                                                 |
| <i>COL3A1</i>  | *120180 | Adipose tissue inflammation                                                                                    | /       | MGI:88453                                                                                                                                                                     |
| <i>CPE</i>     | *114855 | BDV syndrome                                                                                                   | #619326 |                                                                                                                                                                               |
| <i>CPEB4</i>   | *610607 | Obesity                                                                                                        | /       | doi:10.1155/2018/3848560                                                                                                                                                      |
| <i>CRY2</i>    | *603732 | Glucose and lipid metabolism modulation                                                                        | /       | <a href="https://www.genecards.org/cgi-bin/carddisp.pl?gene=CRY2&amp;keywords=CRY2">https://www.genecards.org/cgi-bin/carddisp.pl?gene=CRY2&amp;keywords=CRY2</a>             |
| <i>CYP19A1</i> | *107910 | Synthesis of cholesterol, steroids and other lipids                                                            | /       | <a href="https://www.genecards.org/cgi-bin/carddisp.pl?gene=CYP19A1&amp;keywords=CYP19A1">https://www.genecards.org/cgi-bin/carddisp.pl?gene=CYP19A1&amp;keywords=CYP19A1</a> |
| <i>DNAAF1</i>  | *613193 | Morbid obesity                                                                                                 | /       | doi:10.3390/genes5030709                                                                                                                                                      |
| <i>EBF1</i>    | *164343 | Regulation of lipid metabolism                                                                                 | /       | <a href="https://www.genecards.org/cgi-bin/carddisp.pl?gene=EBF1&amp;keywords=EBF1">https://www.genecards.org/cgi-bin/carddisp.pl?gene=EBF1&amp;keywords=EBF1</a>             |
| <i>ELN</i>     | *130160 | WBS                                                                                                            | #194050 | doi:10.1002/ajmg.a.30400                                                                                                                                                      |
| <i>ENPP1</i>   | *173335 | Susceptibility to obesity                                                                                      | #601665 |                                                                                                                                                                               |
| <i>EPAS1</i>   | *603349 | Insulin resistance and obesity                                                                                 | /       | doi:10.3390/life11060552                                                                                                                                                      |

|  |              |         |                                                                                                                                                           |         |                                                                                                                                                                       |
|--|--------------|---------|-----------------------------------------------------------------------------------------------------------------------------------------------------------|---------|-----------------------------------------------------------------------------------------------------------------------------------------------------------------------|
|  | <i>ESR1</i>  | *133430 | Increased white fat cell number and size                                                                                                                  | /       | MGI:1352467                                                                                                                                                           |
|  | <i>ESRRA</i> | *601998 | Regulation of lipid metabolism                                                                                                                            | /       | <a href="https://www.genecards.org/cgi-bin/carddisp.pl?gene=ESRRA&amp;keywords=ESRRA">https://www.genecards.org/cgi-bin/carddisp.pl?gene=ESRRA&amp;keywords=ESRRA</a> |
|  | <i>FABP2</i> | *134640 | Intracellular transport of long-chain fatty acids and their acyl-CoA esters, triglyceride-rich lipoprotein synthesis, lipid sensor for energy homeostasis | /       | <a href="https://www.genecards.org/cgi-bin/carddisp.pl?gene=FABP2&amp;keywords=FABP2">https://www.genecards.org/cgi-bin/carddisp.pl?gene=FABP2&amp;keywords=FABP2</a> |
|  | <i>FABP4</i> | *600434 | Lipid transport in adipocytes. Delivery of long-chain fatty acids to their receptors in the nucleus                                                       | /       | <a href="https://www.genecards.org/cgi-bin/carddisp.pl?gene=FABP4&amp;keywords=FABP4">https://www.genecards.org/cgi-bin/carddisp.pl?gene=FABP4&amp;keywords=FABP4</a> |
|  | <i>FFAR4</i> | *609044 | Susceptibility to obesity                                                                                                                                 | #607514 |                                                                                                                                                                       |
|  | <i>FGF21</i> | *609436 | Glucose uptake stimulation in differentiated adipocytes                                                                                                   | /       | <a href="https://www.genecards.org/cgi-bin/carddisp.pl?gene=FGF21&amp;keywords=FGF21">https://www.genecards.org/cgi-bin/carddisp.pl?gene=FGF21&amp;keywords=FGF21</a> |
|  | <i>FOXO1</i> | /       | Regulation of metabolic homeostasis                                                                                                                       | /       | <a href="https://www.genecards.org/cgi-bin/carddisp.pl?gene=FOXO1&amp;keywords=FOXO1">https://www.genecards.org/cgi-bin/carddisp.pl?gene=FOXO1&amp;keywords=FOXO1</a> |
|  | <i>FTO</i>   | *610966 | Susceptibility to obesity                                                                                                                                 | #612460 |                                                                                                                                                                       |
|  | <i>FZD9</i>  | *601766 | Modulation in adipose tissue by chronic hyperadiponectinemia                                                                                              | /       | doi:10.1371/journal.pone.0067712                                                                                                                                      |
|  | <i>GCKR</i>  | *600842 | Glucokinase regulation by forming an inactive complex with glucokinase                                                                                    | /       | <a href="https://www.genecards.org/cgi-bin/carddisp.pl?gene=GCKR&amp;keywords=GCKR">https://www.genecards.org/cgi-bin/carddisp.pl?gene=GCKR&amp;keywords=GCKR</a>     |
|  | <i>GDF15</i> | *605312 | Food intake, energy expenditure, body weight regulation                                                                                                   | /       | <a href="https://www.genecards.org/cgi-bin/carddisp.pl?gene=GDF15&amp;keywords=GDF15">https://www.genecards.org/cgi-bin/carddisp.pl?gene=GDF15&amp;keywords=GDF15</a> |
|  | <i>GDF3</i>  | *606522 | Adipose-tissue homeostasis, energy balance regulation                                                                                                     | /       | <a href="https://www.genecards.org/cgi-bin/carddisp.pl?gene=GDF3&amp;keywords=GDF3">https://www.genecards.org/cgi-bin/carddisp.pl?gene=GDF3&amp;keywords=GDF3</a>     |
|  | <i>GFRAL</i> | *617837 | Food intake, energy expenditure, body weight regulation                                                                                                   | /       | <a href="https://www.genecards.org/cgi-bin/carddisp.pl?gene=GFRAL&amp;keywords=GFRAL">https://www.genecards.org/cgi-bin/carddisp.pl?gene=GFRAL&amp;keywords=GFRAL</a> |
|  | <i>GHR</i>   | *600946 | Increased total body fat amount                                                                                                                           | /       | MGI:95708                                                                                                                                                             |
|  | <i>GHRL</i>  | *605353 | Susceptibility to obesity                                                                                                                                 | #601665 |                                                                                                                                                                       |
|  | <i>GHSR</i>  | *601898 | Energy homeostasis and body weight regulation                                                                                                             | /       | <a href="https://www.genecards.org/cgi-bin/carddisp.pl?gene=GHSR&amp;keywords=GHSR">https://www.genecards.org/cgi-bin/carddisp.pl?gene=GHSR&amp;keywords=GHSR</a>     |
|  | <i>GPD1</i>  | *138420 | Critical role in carbohydrate and lipid metabolism                                                                                                        | /       | <a href="https://www.genecards.org/cgi-bin/carddisp.pl?gene=GPD1&amp;keywords=GPD1">https://www.genecards.org/cgi-bin/carddisp.pl?gene=GPD1&amp;keywords=GPD1</a>     |
|  | <i>GPR26</i> | *604847 | Increased susceptibility to diet-induced                                                                                                                  | /       | MGI:2441758                                                                                                                                                           |

|  |               |         |                                                                                                                                           |         |                                                                                                                                                                           |
|--|---------------|---------|-------------------------------------------------------------------------------------------------------------------------------------------|---------|---------------------------------------------------------------------------------------------------------------------------------------------------------------------------|
|  |               |         | obesity with increased food intake                                                                                                        |         |                                                                                                                                                                           |
|  | <i>GPR82</i>  | *300748 | Abnormal adipose tissue amount                                                                                                            | /       | MGI:2441734                                                                                                                                                               |
|  | <i>GPRC6A</i> | *613572 | Coordination of nutritional and hormonal signals through anabolic steroids                                                                | /       | <a href="https://www.genecards.org/cgi-bin/carddisp.pl?gene=GPRC6A&amp;keywords=GPRC6A">https://www.genecards.org/cgi-bin/carddisp.pl?gene=GPRC6A&amp;keywords=GPRC6A</a> |
|  | <i>GRB14</i>  | *601524 | Insulin receptor signaling inhibitor that regulates growth and metabolism                                                                 | /       | <a href="https://www.genecards.org/cgi-bin/carddisp.pl?gene=GRB14&amp;keywords=GRB14">https://www.genecards.org/cgi-bin/carddisp.pl?gene=GRB14&amp;keywords=GRB14</a>     |
|  | <i>GRIK1</i>  | *138245 | Severe early-onset obesity                                                                                                                | /       | doi:10.1371/journal.pgen.1006657                                                                                                                                          |
|  | <i>GRPR</i>   | *305670 | Contribution to the regulation of food intake                                                                                             | /       | <a href="https://www.genecards.org/cgi-bin/carddisp.pl?gene=GRPR&amp;keywords=GRPR">https://www.genecards.org/cgi-bin/carddisp.pl?gene=GRPR&amp;keywords=GRPR</a>         |
|  | <i>GSDMB</i>  | *611221 | Adipocyte development and differentiation                                                                                                 | /       | doi:10.1038/ng.3738                                                                                                                                                       |
|  | <i>GSK3A</i>  | *606784 | Negative regulator in the hormonal control of glucose homeostasis                                                                         | /       | <a href="https://www.genecards.org/cgi-bin/carddisp.pl?gene=GSK3A&amp;keywords=GSK3A">https://www.genecards.org/cgi-bin/carddisp.pl?gene=GSK3A&amp;keywords=GSK3A</a>     |
|  | <i>GSK3B</i>  | *605004 | Negative regulator of glucose homeostasis involved in energy metabolism, inflammation, mitochondrial dysfunction                          | /       | <a href="https://www.genecards.org/cgi-bin/carddisp.pl?gene=GSK3B&amp;keywords=GSK3B">https://www.genecards.org/cgi-bin/carddisp.pl?gene=GSK3B&amp;keywords=GSK3B</a>     |
|  | <i>GUCY2C</i> | *601330 | Increased subcutaneous adipose tissue amount                                                                                              | /       | MGI:106903                                                                                                                                                                |
|  | <i>H6PD</i>   | *138090 | Cortisone reductase deficiency 1                                                                                                          | #604931 |                                                                                                                                                                           |
|  | <i>HDAC4</i>  | *605314 | High <i>HDAC4</i> expression in visceral adipose tissue in obese. <i>HDAC4</i> is negatively correlated with pro-inflammatory cytokines   | /       | doi:10.1080/13813455.2020.1734843                                                                                                                                         |
|  | <i>HIF1A</i>  | *603348 | HIF-1 $\alpha$ activity contributes to chronic inflammation in obesity.                                                                   | /       | doi:10.1152/ajpendo.00626.2010                                                                                                                                            |
|  | <i>HIPK2</i>  | *606868 | Essential regulator of white fat development                                                                                              | /       | doi:10.1073/pnas.1322275111                                                                                                                                               |
|  | <i>HMGA2</i>  | *600698 | Role in adipogenesis and mesenchymal differentiation. Knockout study in mouse shows that <i>HMGA2</i> is involved in diet-induced obesity | /       | <a href="https://www.genecards.org/cgi-bin/carddisp.pl?gene=HMGA2&amp;keywords=HMGA2">https://www.genecards.org/cgi-bin/carddisp.pl?gene=HMGA2&amp;keywords=HMGA2</a>     |
|  | <i>HOXA1</i>  | *142955 | Expression linked with fat accumulation in brown adipocytes                                                                               | /       | doi:10.1016/j.gep.2016.01.002                                                                                                                                             |
|  | <i>HOXA10</i> | *142957 | Expression linked with fat accumulation in brown adipocytes                                                                               | /       | doi:10.1016/j.gep.2016.01.002                                                                                                                                             |

|  |               |         |                                                                                            |         |                                                                                                                                                                           |
|--|---------------|---------|--------------------------------------------------------------------------------------------|---------|---------------------------------------------------------------------------------------------------------------------------------------------------------------------------|
|  | <i>HOXA2</i>  | *604685 | Expressed in adipose tissue                                                                | /       | doi:10.1210/jc.2012-2953                                                                                                                                                  |
|  | <i>HOXA4</i>  | *142953 | Expression linked with fat accumulation in brown adipocytes                                | /       | doi:10.1016/j.gep.2016.01.002                                                                                                                                             |
|  | <i>HOXA5</i>  | *142952 | Expression linked with fat accumulation in brown adipocytes                                | /       | doi:10.1016/j.gep.2016.01.002                                                                                                                                             |
|  | <i>HOXB4</i>  | *142965 | Upregulated during adipocyte development                                                   | /       | doi:10.1186/gb-2010-11-8-r80                                                                                                                                              |
|  | <i>HOXB8</i>  | *142963 | Expressed in adipose tissue                                                                | /       | doi:10.1210/jc.2012-2953                                                                                                                                                  |
|  | <i>HOXC13</i> | *142976 | Body fat distribution modulation                                                           | /       | doi:10.1038/ng.685                                                                                                                                                        |
|  | <i>HOXC4</i>  | *142974 | Expressed in adipose tissue                                                                | /       | <a href="https://www.genecards.org/cgi-bin/carddisp.pl?gene=HOXC4&amp;keywords=HOXC4">https://www.genecards.org/cgi-bin/carddisp.pl?gene=HOXC4&amp;keywords=HOXC4</a>     |
|  | <i>HOXC8</i>  | *142970 | Expressed in adipose tissue                                                                | /       | doi:10.1210/jc.2012-2953                                                                                                                                                  |
|  | <i>HOXD4</i>  | *142981 | Adipocytes differentiation                                                                 | /       | doi:10.3389/fphys.2014.00479                                                                                                                                              |
|  | <i>IFI35</i>  | *600735 | Inflammation regulation                                                                    | /       | <a href="https://www.genecards.org/cgi-bin/carddisp.pl?gene=IFI35&amp;keywords=IFI35">https://www.genecards.org/cgi-bin/carddisp.pl?gene=IFI35&amp;keywords=IFI35</a>     |
|  | <i>IFT74</i>  | *608040 | BBS22                                                                                      | #617119 |                                                                                                                                                                           |
|  | <i>IL18</i>   | *600953 | Increased white adipose tissue amount                                                      | /       | MGI:107936                                                                                                                                                                |
|  | <i>IL6</i>    | *147620 | Increases lipolysis, improves insulin resistance, regulates energy and glucose homeostasis | /       | <a href="https://www.genecards.org/cgi-bin/carddisp.pl?gene=IL6&amp;keywords=IL6">https://www.genecards.org/cgi-bin/carddisp.pl?gene=IL6&amp;keywords=IL6</a>             |
|  | <i>IL6R</i>   | *147880 | Energy and glucose homeostasis regulation                                                  | /       | <a href="https://www.genecards.org/cgi-bin/carddisp.pl?gene=IL6R&amp;keywords=IL6R">https://www.genecards.org/cgi-bin/carddisp.pl?gene=IL6R&amp;keywords=IL6R</a>         |
|  | <i>INSIG2</i> | *608660 | Negative regulator of cholesterol biosynthesis                                             | /       | <a href="https://www.genecards.org/cgi-bin/carddisp.pl?gene=INSIG2&amp;keywords=INSIG2">https://www.genecards.org/cgi-bin/carddisp.pl?gene=INSIG2&amp;keywords=INSIG2</a> |
|  | <i>IRS1</i>   | +147545 | Susceptibility to type 2 diabetes mellitus                                                 | #125853 |                                                                                                                                                                           |
|  | <i>IRX3</i>   | *612985 | Energy metabolism regulator                                                                | /       | <a href="https://www.genecards.org/cgi-bin/carddisp.pl?gene=IRX3&amp;keywords=IRX3">https://www.genecards.org/cgi-bin/carddisp.pl?gene=IRX3&amp;keywords=IRX3</a>         |
|  | <i>ITGA9</i>  | *603963 | Abnormal lymph circulation                                                                 | /       | MGI:104756                                                                                                                                                                |
|  | <i>KDM3A</i>  | *611512 | Involved in obesity resistance through regulation of metabolic genes                       | /       | <a href="https://www.genecards.org/cgi-bin/carddisp.pl?gene=KDM3A&amp;keywords=KDM3A">https://www.genecards.org/cgi-bin/carddisp.pl?gene=KDM3A&amp;keywords=KDM3A</a>     |
|  | <i>KLF16</i>  | *606139 | Lipid metabolism regulation                                                                | /       | doi:10.1136/gutjnl-2020-321774                                                                                                                                            |
|  | <i>KRAS</i>   | *190070 | Lymphedema in developmental syndromes                                                      | /       | doi:10.1038/ejhg.2015.175                                                                                                                                                 |



|  |                |         |                                                                                                                        |         |                                                                                                                                                                           |
|--|----------------|---------|------------------------------------------------------------------------------------------------------------------------|---------|---------------------------------------------------------------------------------------------------------------------------------------------------------------------------|
|  | <i>LPIN1</i>   | *605518 | Required for adipocyte differentiation                                                                                 | /       | <a href="https://www.genecards.org/cgi-bin/carddisp.pl?gene=LPIN1&amp;keywords=LPIN1">https://www.genecards.org/cgi-bin/carddisp.pl?gene=LPIN1&amp;keywords=LPIN1</a>     |
|  | <i>LRP2</i>    | *600073 | Critical component of the hypothalamic feeding regulatory pathway                                                      | /       | doi:10.1038/ncomms2896                                                                                                                                                    |
|  | <i>LRRC8A</i>  | *608360 | Abnormal fat cell morphology                                                                                           | /       | MGI:2652847                                                                                                                                                               |
|  | <i>LYPLAL1</i> | *616548 | Obesity                                                                                                                | /       | doi:10.1016/j.mce.2015.05.001.                                                                                                                                            |
|  | <i>MAPK11</i>  | *602898 | Inflammatory response                                                                                                  | /       | <a href="https://www.genecards.org/cgi-bin/carddisp.pl?gene=MAPK11&amp;keywords=MAPK11">https://www.genecards.org/cgi-bin/carddisp.pl?gene=MAPK11&amp;keywords=MAPK11</a> |
|  | <i>MAPK12</i>  | *602399 | Inflammatory response                                                                                                  | /       | <a href="https://www.genecards.org/cgi-bin/carddisp.pl?gene=MAPK12&amp;keywords=MAPK12">https://www.genecards.org/cgi-bin/carddisp.pl?gene=MAPK12&amp;keywords=MAPK12</a> |
|  | <i>MAPK13</i>  | *602899 | Inflammatory response                                                                                                  | /       | <a href="https://www.genecards.org/cgi-bin/carddisp.pl?gene=MAPK13&amp;keywords=MAPK13">https://www.genecards.org/cgi-bin/carddisp.pl?gene=MAPK13&amp;keywords=MAPK13</a> |
|  | <i>MAPK14</i>  | *600289 | Inflammatory response                                                                                                  | /       | <a href="https://www.genecards.org/cgi-bin/carddisp.pl?gene=MAPK14&amp;keywords=MAPK14">https://www.genecards.org/cgi-bin/carddisp.pl?gene=MAPK14&amp;keywords=MAPK14</a> |
|  | <i>MC1R</i>    | *155555 | Negative regulation of inflammatory response                                                                           | /       | <a href="https://www.genecards.org/cgi-bin/carddisp.pl?gene=MC1R&amp;keywords=MC1R">https://www.genecards.org/cgi-bin/carddisp.pl?gene=MC1R&amp;keywords=MC1R</a>         |
|  | <i>MCHR1</i>   | *601751 | Feeding behaviors and energy metabolism control                                                                        | /       | <a href="https://www.genecards.org/cgi-bin/carddisp.pl?gene=MCHR1&amp;keywords=MChR1">https://www.genecards.org/cgi-bin/carddisp.pl?gene=MCHR1&amp;keywords=MChR1</a>     |
|  | <i>MED13</i>   | *603808 | Increased susceptibility to obesity and worsened glucose intolerance when fed a high fat diet in mice                  | /       | MGI:3029632                                                                                                                                                               |
|  | <i>MEIS1</i>   | *601739 | Inactivation required for adipogenesis                                                                                 | /       | doi:10.1016/j.celrep.2018.09.086.                                                                                                                                         |
|  | <i>MLXIPL</i>  | *605678 | Abnormal glucose and lipid homeostasis                                                                                 | /       | MGI:1927999                                                                                                                                                               |
|  | <i>MMP19</i>   | *601807 | Increased fat cell size                                                                                                | /       | MGI:1927899                                                                                                                                                               |
|  | <i>MRAP2</i>   | *615410 | Susceptibility to obesity                                                                                              | #615457 |                                                                                                                                                                           |
|  | <i>MSX2</i>    | *123101 | Adipogenic differentiation suppressor                                                                                  | /       | doi:10.1074/jbc.M306972200                                                                                                                                                |
|  | <i>NBEA</i>    | *604889 | Abnormal interscapular fat pad morphology                                                                              | /       | MGI:1347075                                                                                                                                                               |
|  | <i>NCOA1</i>   | *602691 | Required for energy control balance between white and brown adipose tissues and for mediating steroid hormone response | /       | <a href="https://www.genecards.org/cgi-bin/carddisp.pl?gene=NCOA1&amp;keywords=NCOA1">https://www.genecards.org/cgi-bin/carddisp.pl?gene=NCOA1&amp;keywords=NCOA1</a>     |
|  | <i>NCOA2</i>   | *601993 | Required for energy control balance                                                                                    | /       | <a href="https://www.genecards.org/cgi-">https://www.genecards.org/cgi-</a>                                                                                               |

|  |       |         |                                                                                                               |         |                                                                                                                                                                       |
|--|-------|---------|---------------------------------------------------------------------------------------------------------------|---------|-----------------------------------------------------------------------------------------------------------------------------------------------------------------------|
|  |       |         | between white and brown adipose tissues and for mediating steroid hormone response                            |         | bin/carddisp.pl?gene=NCOA2&keywords=NCOA2                                                                                                                             |
|  | NCOA3 | *601937 | Involved in the coactivation of nuclear receptors (steroids, retinoids, prostanoids)                          | /       | <a href="https://www.genecards.org/cgi-bin/carddisp.pl?gene=NCOA3&amp;keywords=NCOA3">https://www.genecards.org/cgi-bin/carddisp.pl?gene=NCOA3&amp;keywords=NCOA3</a> |
|  | NDN   | *602117 | Prader-Willi syndrome                                                                                         | #176270 |                                                                                                                                                                       |
|  | NEGR1 | *613173 | Predisposition to obesity                                                                                     | #601665 |                                                                                                                                                                       |
|  | NEIL1 | *608844 | Homozygous null mice develop severe obesity, dyslipidemia, fatty liver disease, hyperinsulinemia              | /       | MGI:1920024                                                                                                                                                           |
|  | NF1   | *613113 | Neurofibromatosis type 1 with lymphedema                                                                      | /       | doi:10.3892/ol.2016.4469                                                                                                                                              |
|  | NGEF  | *605991 | Association with abdominal visceral fat                                                                       | /       | doi:10.1371/journal.pone.0137564                                                                                                                                      |
|  | NMU   | *605103 | Pain, stress, inflammation and feeding regulation                                                             | /       | <a href="https://www.genecards.org/cgi-bin/carddisp.pl?gene=NMU&amp;keywords=NMU">https://www.genecards.org/cgi-bin/carddisp.pl?gene=NMU&amp;keywords=NMU</a>         |
|  | NPC1  | *607623 | Obesity                                                                                                       | /       | doi:10.2337/db16-0877                                                                                                                                                 |
|  | NPY   | *162640 | Control of feeding and secretion of gonadotrophin-release hormone                                             | /       | <a href="https://www.genecards.org/cgi-bin/carddisp.pl?gene=NPY&amp;keywords=NPY">https://www.genecards.org/cgi-bin/carddisp.pl?gene=NPY&amp;keywords=NPY</a>         |
|  | NPY4R | *601790 | Obesity                                                                                                       | /       | doi:10.1002/oby.21435                                                                                                                                                 |
|  | NR1D1 | *602408 | Regulation of lipid and bile acid metabolism, adipogenesis, gluconeogenesis, macrophage inflammatory response | /       | <a href="https://www.genecards.org/cgi-bin/carddisp.pl?gene=NR1D1&amp;keywords=NR1D1">https://www.genecards.org/cgi-bin/carddisp.pl?gene=NR1D1&amp;keywords=NR1D1</a> |
|  | NR2F2 | *107773 | Abnormal glucose homeostasis and lipid level                                                                  | /       | MGI:1352452                                                                                                                                                           |
|  | NR2F6 | *132880 | Adipocyte differentiation inhibition                                                                          | /       | doi:10.1074/mcp.M114.045328                                                                                                                                           |
|  | NR3C1 | *138040 | Negative regulation of adipogenesis                                                                           | /       | <a href="https://www.genecards.org/cgi-bin/carddisp.pl?gene=NR3C1&amp;keywords=NR3C1">https://www.genecards.org/cgi-bin/carddisp.pl?gene=NR3C1&amp;keywords=NR3C1</a> |
|  | NTRK2 | *600456 | Obesity, hyperphagia, and developmental delay                                                                 | #613886 |                                                                                                                                                                       |
|  | OGG1  | *601982 | Maintenance of metabolic homeostasis                                                                          | /       | doi:10.1016/j.dnarep.2019.102667                                                                                                                                      |
|  | OMA1  | *617081 | Lipid metabolism regulation                                                                                   | /       | <a href="https://www.genecards.org/cgi-bin/carddisp.pl?gene=OMA1&amp;keywords=OMA1">https://www.genecards.org/cgi-bin/carddisp.pl?gene=OMA1&amp;keywords=OMA1</a>     |

|  |                 |         |                                                                                                                  |         |                                                                                                                                                                                   |
|--|-----------------|---------|------------------------------------------------------------------------------------------------------------------|---------|-----------------------------------------------------------------------------------------------------------------------------------------------------------------------------------|
|  | <i>OSBPL8</i>   | *606736 | Lipid transporter involved in lipid countertransport between the endoplasmic reticulum and the plasma membrane   | /       | <a href="https://www.genecards.org/cgi-bin/carddisp.pl?gene=OSBPL8&amp;keywords=OSBPL8">https://www.genecards.org/cgi-bin/carddisp.pl?gene=OSBPL8&amp;keywords=OSBPL8</a>         |
|  | <i>PANX1</i>    | *608420 | Adipose stromal cell differentiation and fat accumulation                                                        | /       | doi:10.1038/s41598-018-34234-9.                                                                                                                                                   |
|  | <i>PAX6</i>     | *607108 | Pancreatic islet alpha cells differentiation. Glucagon, insulin and somatostatin promoters binding               | /       | <a href="https://www.genecards.org/cgi-bin/carddisp.pl?gene=PAX6&amp;keywords=PAX6">https://www.genecards.org/cgi-bin/carddisp.pl?gene=PAX6&amp;keywords=PAX6</a>                 |
|  | <i>PBX1</i>     | *176310 | Overweight/obesity and metabolic alterations                                                                     | /       | doi:10.4162/nrp.2008.2.4.289.                                                                                                                                                     |
|  | <i>PDE11A</i>   | *604961 | PPNAD2                                                                                                           | #610475 |                                                                                                                                                                                   |
|  | <i>PDE3B</i>    | *602047 | Abnormalities in glycerol and fatty acid levels, changes in adipocyte morphology, decreased body fat percentage. | /       | MGI:1333863                                                                                                                                                                       |
|  | <i>PDX1</i>     | *600733 | MODY4                                                                                                            | #606392 |                                                                                                                                                                                   |
|  | <i>PER1</i>     | *602260 | Abnormal basal metabolism, body weight, estrous cycle, food intake, food preference                              | /       | MGI:1098283                                                                                                                                                                       |
|  | <i>PIGC</i>     | *601730 | Glycosylphosphatidylinositol lipid anchor biosynthesis                                                           | /       | <a href="https://www.genecards.org/cgi-bin/carddisp.pl?gene=PIGC&amp;keywords=PIGC">https://www.genecards.org/cgi-bin/carddisp.pl?gene=PIGC&amp;keywords=PIGC</a>                 |
|  | <i>PIK3CA</i>   | *171834 | Lymphatic malformation                                                                                           | /       | doi:10.1371/journal.pone.0200343                                                                                                                                                  |
|  | <i>PITPNM1</i>  | *608794 | Mice homozygous for a knock-out allele exhibit decrease in circulating cholesterol                               | /       | MGI:1197524                                                                                                                                                                       |
|  | <i>PNPLA2</i>   | *609059 | Neutral lipid storage disease with myopathy                                                                      | #610717 |                                                                                                                                                                                   |
|  | <i>PPARGC1A</i> | *604517 | Blood pressure, cellular cholesterol homeostasis control, development of obesity                                 | /       | <a href="https://www.genecards.org/cgi-bin/carddisp.pl?gene=PPARGC1A&amp;keywords=PPARGC1A">https://www.genecards.org/cgi-bin/carddisp.pl?gene=PPARGC1A&amp;keywords=PPARGC1A</a> |
|  | <i>PPARGC1B</i> | *608886 | Increased risk of obesity.                                                                                       | /       | <a href="https://www.genecards.org/cgi-bin/carddisp.pl?gene=PPARGC1B&amp;keywords=PPARGC1B">https://www.genecards.org/cgi-bin/carddisp.pl?gene=PPARGC1B&amp;keywords=PPARGC1B</a> |
|  | <i>PRDM16</i>   | *605557 | Differentiation of brown adipose tissue                                                                          | /       | <a href="https://www.genecards.org/cgi-bin/carddisp.pl?gene=PRDM16&amp;keywords=PRDM16">https://www.genecards.org/cgi-bin/carddisp.pl?gene=PRDM16&amp;keywords=PRDM16</a>         |
|  | <i>PRDM2</i>    | *601196 | Specific effector of estrogen action                                                                             | /       | <a href="https://www.genecards.org/cgi-bin/carddisp.pl?gene=PRDM2&amp;keywords=PRDM2">https://www.genecards.org/cgi-bin/carddisp.pl?gene=PRDM2&amp;keywords=PRDM2</a>             |
|  | <i>PRKAA1</i>   | *602739 | Cellular energy sensor                                                                                           | /       | <a href="https://www.genecards.org/cgi-">https://www.genecards.org/cgi-</a>                                                                                                       |

|  |                |         |                                                                      |         |                                                                                                                                                                             |
|--|----------------|---------|----------------------------------------------------------------------|---------|-----------------------------------------------------------------------------------------------------------------------------------------------------------------------------|
|  |                |         |                                                                      |         | <a href="#">bin/carddisp.pl?genePRKAA1&amp;keywords=PRKAA1</a>                                                                                                              |
|  | <i>PRKAA2</i>  | *600497 | Cellular energy sensor                                               | /       | <a href="https://www.genecards.org/cgi-bin/carddisp.pl?genePRKAA2&amp;keywords=PRKAA2">https://www.genecards.org/cgi-bin/carddisp.pl?genePRKAA2&amp;keywords=PRKAA2</a>     |
|  | <i>PRKAB1</i>  | *602740 | Cellular energy sensor                                               | /       | <a href="https://www.genecards.org/cgi-bin/carddisp.pl?genePRKAB1&amp;keywords=PRKAB1">https://www.genecards.org/cgi-bin/carddisp.pl?genePRKAB1&amp;keywords=PRKAB1</a>     |
|  | <i>PRKAB2</i>  | *602741 | Cellular energy sensor                                               | /       | <a href="https://www.genecards.org/cgi-bin/carddisp.pl?genePRKAB2&amp;keywords=PRKAB2">https://www.genecards.org/cgi-bin/carddisp.pl?genePRKAB2&amp;keywords=PRKAB2</a>     |
|  | <i>PRKACA</i>  | *601639 | Cellular energy sensor                                               | /       | <a href="https://www.genecards.org/cgi-bin/carddisp.pl?genePRKACA&amp;keywords=PRKACA">https://www.genecards.org/cgi-bin/carddisp.pl?genePRKACA&amp;keywords=PRKACA</a>     |
|  | <i>PRKACB</i>  | *176892 | Cellular energy sensor                                               | /       | <a href="https://www.genecards.org/cgi-bin/carddisp.pl?genePRKACB&amp;keywords=PRKACB">https://www.genecards.org/cgi-bin/carddisp.pl?genePRKACB&amp;keywords=PRKACB</a>     |
|  | <i>PRKAG1</i>  | *602742 | Cellular energy sensor                                               | /       | <a href="https://www.genecards.org/cgi-bin/carddisp.pl?genePRKAG1&amp;keywords=PRKAG1">https://www.genecards.org/cgi-bin/carddisp.pl?genePRKAG1&amp;keywords=PRKAG1</a>     |
|  | <i>PRKAG2</i>  | *602743 | Cellular energy sensor                                               | /       | <a href="https://www.genecards.org/cgi-bin/carddisp.pl?genePRKAG2&amp;keywords=PRKAG2">https://www.genecards.org/cgi-bin/carddisp.pl?genePRKAG2&amp;keywords=PRKAG2</a>     |
|  | <i>PRKAG3</i>  | *604976 | Skeletal muscle glycogen content and metabolism QTL                  | #619030 | <a href="https://www.genecards.org/cgi-bin/carddisp.pl?genePRKAG3&amp;keywords=PRKAG3">https://www.genecards.org/cgi-bin/carddisp.pl?genePRKAG3&amp;keywords=PRKAG3</a>     |
|  | <i>PRKAR1A</i> | *188830 | Carney complex, type 1                                               | #160980 |                                                                                                                                                                             |
|  | <i>PRKAR2A</i> | *176910 | Regulation of lipid and glucose metabolism                           | /       | <a href="https://www.genecards.org/cgi-bin/carddisp.pl?genePRKAR2A&amp;keywords=PRKAR2A">https://www.genecards.org/cgi-bin/carddisp.pl?genePRKAR2A&amp;keywords=PRKAR2A</a> |
|  | <i>PRKAR2B</i> | *176912 | Regulation of lipid and glucose metabolism                           | /       | <a href="https://www.genecards.org/cgi-bin/carddisp.pl?genePRKAR2B&amp;keywords=PRKAR2B">https://www.genecards.org/cgi-bin/carddisp.pl?genePRKAR2B&amp;keywords=PRKAR2B</a> |
|  | <i>PROX1</i>   | *601546 | Lymphedema                                                           | /       | <a href="#">doi:10.1002/mgg3.1424</a>                                                                                                                                       |
|  | <i>PRRC2A</i>  | *142580 | Insulin-dependent diabetes mellitus                                  | /       | <a href="https://www.genecards.org/cgi-bin/carddisp.pl?genePRRC2A&amp;keywords=PRRC2A">https://www.genecards.org/cgi-bin/carddisp.pl?genePRRC2A&amp;keywords=PRRC2A</a>     |
|  | <i>PTN</i>     | *162095 | Proliferation promotion of adipocytes precursor cells                | /       | <a href="#">doi:10.1126/scisignal.aag0487</a>                                                                                                                               |
|  | <i>PYY</i>     | *600781 | Pancreatic secretion, gut mobility and energy homeostasis regulation | /       | <a href="https://www.genecards.org/cgi-bin/carddisp.pl?genePYY&amp;keywords=PYY">https://www.genecards.org/cgi-bin/carddisp.pl?genePYY&amp;keywords=PYY</a>                 |
|  | <i>RARB</i>    | *180220 | Association with carbohydrate intake                                 | /       | <a href="#">doi:10.1038/s41380-018-0079-4</a>                                                                                                                               |
|  | <i>RB1</i>     | *614041 | Retinoblastoma and lipomatosis                                       | /       | <a href="#">doi:10.5999/aps.2014.41.6.785.</a>                                                                                                                              |
|  | <i>RBP4</i>    | *180250 | Adipokine                                                            | /       | <a href="#">doi:10.1530/EJE-11-0431.</a>                                                                                                                                    |
|  | <i>RETN</i>    | *605565 | Susceptibility to noninsulin-dependent                               | #125853 |                                                                                                                                                                             |

|  |                 |         |                                                                                                                                                   |         |                                                                                                                                                                                 |
|--|-----------------|---------|---------------------------------------------------------------------------------------------------------------------------------------------------|---------|---------------------------------------------------------------------------------------------------------------------------------------------------------------------------------|
|  |                 |         | diabetes mellitus                                                                                                                                 |         |                                                                                                                                                                                 |
|  | <i>RGS2</i>     | *600861 | Brown adipose tissue function and differentiation balance                                                                                         | /       | doi:10.1016/j.molmet.2019.09.015                                                                                                                                                |
|  | <i>RREB1</i>    | *602209 | Brown adipocyte differentiation                                                                                                                   | /       | <a href="https://www.genecards.org/cgi-bin/carddisp.pl?geneRREB1&amp;keywords=RREB1">https://www.genecards.org/cgi-bin/carddisp.pl?geneRREB1&amp;keywords=RREB1</a>             |
|  | <i>RSC1A1</i>   | *601966 | Homozygous null mice develop obesity, increased serum cholesterol and leptin levels and increased absorption of D-glucose in the small intestine. | /       | MGI:3526447                                                                                                                                                                     |
|  | <i>RSPO3</i>    | *610574 | Impact on body fat distribution, adipose cell biology regulation                                                                                  | /       | doi:10.1038/s41467-020-16592-z                                                                                                                                                  |
|  | <i>RYR1</i>     | *180901 | Hypothalamic expression                                                                                                                           | /       | doi:10.1152/physiolgenomics.00006.2015                                                                                                                                          |
|  | <i>SCD</i>      | *604031 | Lipid biosynthesis, mitochondrial fatty acid oxidation regulation, body energy homeostasis                                                        | /       | <a href="https://www.genecards.org/cgi-bin/carddisp.pl?geneSCD&amp;keywords=SCD">https://www.genecards.org/cgi-bin/carddisp.pl?geneSCD&amp;keywords=SCD</a>                     |
|  | <i>SCPEP1</i>   | /       | Association with intramuscular fat in pigs                                                                                                        | /       | doi:10.1111/jbg.12189                                                                                                                                                           |
|  | <i>SDC3</i>     | *186357 | Association with obesity                                                                                                                          | #601665 |                                                                                                                                                                                 |
|  | <i>SERPINA6</i> | *122500 | Major transport protein for glucocorticoids and progestins in the blood                                                                           | /       | <a href="https://www.genecards.org/cgi-bin/carddisp.pl?geneSERPINA6&amp;keywords=SERPINA6">https://www.genecards.org/cgi-bin/carddisp.pl?geneSERPINA6&amp;keywords=SERPINA6</a> |
|  | <i>SFRP1</i>    | *604156 | Increased adiposity, dysregulated glucose metabolism, enhanced macrophage infiltration in deficient mice                                          | /       | doi:10.1371/journal.pone.0078320                                                                                                                                                |
|  | <i>SFRP5</i>    | *604158 | Anti-inflammatory adipokine involved in obesity, type 2 diabetes mellitus                                                                         | /       | doi:10.1111/jcmm.15023                                                                                                                                                          |
|  | <i>SIRT1</i>    | *604479 | Sensor of the cytosolic ratio of NAD(+)/NADH, influenced by glucose deprivation and caloric restriction                                           | /       | <a href="https://www.genecards.org/cgi-bin/carddisp.pl?geneSIRT1&amp;keywords=SIRT1">https://www.genecards.org/cgi-bin/carddisp.pl?geneSIRT1&amp;keywords=SIRT1</a>             |
|  | <i>SIRT6</i>    | *606211 | Glucose homeostasis regulation                                                                                                                    | /       | <a href="https://www.genecards.org/cgi-bin/carddisp.pl?geneSIRT6&amp;keywords=SIRT6">https://www.genecards.org/cgi-bin/carddisp.pl?geneSIRT6&amp;keywords=SIRT6</a>             |
|  | <i>SKP2</i>     | *601436 | Adipocyte proliferation control                                                                                                                   | /       | doi:10.1074/jbc.M608144200                                                                                                                                                      |
|  | <i>SLC13A5</i>  | *608305 | Utilization of circulating citrate facilitation for the generation of metabolic energy and the synthesis of fatty acids and cholesterol           | /       | <a href="https://www.genecards.org/cgi-bin/carddisp.pl?geneSLC13A5&amp;keywords=SLC13A5">https://www.genecards.org/cgi-bin/carddisp.pl?geneSLC13A5&amp;keywords=SLC13A5</a>     |
|  | <i>SLC2A4</i>   | *138190 | Insulin-regulated facilitative glucose                                                                                                            | /       | <a href="https://www.genecards.org/cgi-">https://www.genecards.org/cgi-</a>                                                                                                     |

|                |         |                                                                                                                                                  |         |                                                                                                                                                                         |
|----------------|---------|--------------------------------------------------------------------------------------------------------------------------------------------------|---------|-------------------------------------------------------------------------------------------------------------------------------------------------------------------------|
|                |         | transporter                                                                                                                                      |         | bin/carddisp.pl?geneSLC2A4&keywords=SLC2A4                                                                                                                              |
| <i>SLC35D3</i> | *612519 | Mutation in this gene causes metabolic syndrome                                                                                                  | /       | doi:10.1371/journal.pgen.1004124                                                                                                                                        |
| <i>SLCO4C1</i> | *609013 | Severe early-onset obesity                                                                                                                       | /       | doi:10.1371/journal.pgen.1006657                                                                                                                                        |
| <i>SNAP25</i>  | *600322 | Metabolic disease                                                                                                                                | /       | doi:10.1016/j.neuroscience.2018.07.035                                                                                                                                  |
| <i>SNRPN</i>   | *182279 | Prader-Willi syndrome                                                                                                                            | #176270 |                                                                                                                                                                         |
| <i>SREBF1</i>  | *184756 | Cholesterol biosynthesis and lipid homeostasis regulation                                                                                        | /       | <a href="https://www.genecards.org/cgi-bin/carddisp.pl?geneSREBF1&amp;keywords=SREBF1">https://www.genecards.org/cgi-bin/carddisp.pl?geneSREBF1&amp;keywords=SREBF1</a> |
| <i>STAB1</i>   | *608560 | Low density lipoprotein endocytosis regulation                                                                                                   | /       | <a href="https://www.genecards.org/cgi-bin/carddisp.pl?geneSTAB1&amp;keywords=STAB1">https://www.genecards.org/cgi-bin/carddisp.pl?geneSTAB1&amp;keywords=STAB1</a>     |
| <i>STAT3</i>   | *102582 | Melanocortin production and body energy homeostasis regulation                                                                                   | /       | <a href="https://www.genecards.org/cgi-bin/carddisp.pl?geneSTAT3&amp;keywords=STAT3">https://www.genecards.org/cgi-bin/carddisp.pl?geneSTAT3&amp;keywords=STAT3</a>     |
| <i>STAT5A</i>  | *601511 | Adipogenesis promotion                                                                                                                           | /       | doi:10.1007/s12199-010-0193-7                                                                                                                                           |
| <i>STAT5B</i>  | *604260 | Impaired glucose tolerance, increased circulating triglyceride level, increased total body fat amount                                            | /       | MGI:103035                                                                                                                                                              |
| <i>STRA6</i>   | *610745 | In obesity, downregulation in adipocytes and adipose stromovascular fraction                                                                     | /       | doi:10.1128/MCB.01106-13                                                                                                                                                |
| <i>SYPL2</i>   | /       | Susceptibility to morbid obesity                                                                                                                 | /       | doi:10.1038/ejhg.2014.255                                                                                                                                               |
| <i>TAF7L</i>   | *300314 | Abnormal brown adipose tissue morphology, thermogenesis, differentiation                                                                         | /       | MGI:1921719                                                                                                                                                             |
| <i>TBC1D1</i>  | *609850 | Involved in the insulin-stimulated glucose uptake into cells                                                                                     | /       | <a href="https://www.genecards.org/cgi-bin/carddisp.pl?geneTBC1D1&amp;keywords=TBC1D1">https://www.genecards.org/cgi-bin/carddisp.pl?geneTBC1D1&amp;keywords=TBC1D1</a> |
| <i>TBC1D4</i>  | *612465 | Noninsulin-dependent diabetes mellitus 5                                                                                                         | #616087 |                                                                                                                                                                         |
| <i>TBX15</i>   | *604127 | Expression positively correlated with glycolytic metabolism, inversely correlated with obesity in subcutaneous and visceral white adipose tissue | /       | doi:10.2337/db17-0218                                                                                                                                                   |
| <i>TGFB1</i>   | *190180 | Browning of white fat                                                                                                                            | /       | doi:10.1016/j.molmet.2018.07.008                                                                                                                                        |
| <i>TGM2</i>    | *190196 | A homozygous null mutation causes alterations in glucose and aerobic energy metabolism                                                           | /       | MGI:98731                                                                                                                                                               |
| <i>TMEM18</i>  | *613220 | KO homozygous mice exhibit increase in                                                                                                           | /       | MGI:2387176                                                                                                                                                             |

|  |               |         |                                                                                                                                                                                                                                                                                                                                |         |                                                                                                                                                                     |
|--|---------------|---------|--------------------------------------------------------------------------------------------------------------------------------------------------------------------------------------------------------------------------------------------------------------------------------------------------------------------------------|---------|---------------------------------------------------------------------------------------------------------------------------------------------------------------------|
|  |               |         | body weight, fat mass, susceptibility to diet-induced obesity, increased food intake                                                                                                                                                                                                                                           |         |                                                                                                                                                                     |
|  | <i>TNXB</i>   | *600985 | Involved in fat deposition in sheep                                                                                                                                                                                                                                                                                            | /       | doi:10.1186/s12864-018-4747-1                                                                                                                                       |
|  | <i>TRH</i>    | *613879 | Increased circulating cholesterol, creatinine, HDL cholesterol levels                                                                                                                                                                                                                                                          | /       | MGI:98823                                                                                                                                                           |
|  | <i>TRIM72</i> | *613288 | Mediation of the degradation of the insulin receptor and insulin receptor substrate 1. When upregulated, metabolic syndrome featuring insulin resistance, obesity, hypertension, dyslipidaemia                                                                                                                                 | /       | doi:10.1038/nature11834                                                                                                                                             |
|  | <i>TRPV1</i>  | *602076 | Increased body weight                                                                                                                                                                                                                                                                                                          | /       | MGI:1341787                                                                                                                                                         |
|  | <i>TTR</i>    | *176300 | Transthyretin antisense oligonucleotides improve insulin sensitivity in obese mice                                                                                                                                                                                                                                             | /       | doi:10.2337/db14-0970                                                                                                                                               |
|  | <i>TUB</i>    | *601197 | Retinal dystrophy and obesity                                                                                                                                                                                                                                                                                                  | #616188 |                                                                                                                                                                     |
|  | <i>TYK2</i>   | *176941 | Abnormal body temperature homeostasis, brown adipose tissue morphology, fat cell differentiation, mitochondrial physiology, decreased energy expenditure, impaired adaptive thermogenesis, glucose tolerance, increased body weight, cholesterol level, circulating free fatty acids level, circulating insulin level, obesity | /       | MGI:1929470                                                                                                                                                         |
|  | <i>UBE2E2</i> | *602163 | Associated with ectopic-fat traits                                                                                                                                                                                                                                                                                             | /       | doi:10.1038/ng.3738                                                                                                                                                 |
|  | <i>UCP1</i>   | *113730 | Thermogenic respiration                                                                                                                                                                                                                                                                                                        | /       | <a href="https://www.genecards.org/cgi-bin/carddisp.pl?geneUCP1&amp;keywords=UCP1">https://www.genecards.org/cgi-bin/carddisp.pl?geneUCP1&amp;keywords=UCP1</a>     |
|  | <i>UCP2</i>   | *601693 | Susceptibility to obesity                                                                                                                                                                                                                                                                                                      | #607447 |                                                                                                                                                                     |
|  | <i>UCP3</i>   | *602044 | Thermogenesis and energy balance                                                                                                                                                                                                                                                                                               | /       | <a href="https://www.genecards.org/cgi-bin/carddisp.pl?geneUCP3&amp;keywords=UCP3">https://www.genecards.org/cgi-bin/carddisp.pl?geneUCP3&amp;keywords=UCP3</a>     |
|  | <i>VEGFA</i>  | *192240 | Key factor in the regulation of angiogenesis in adipose tissue                                                                                                                                                                                                                                                                 | /       | doi:10.1038/s41598-017-16686-7                                                                                                                                      |
|  | <i>VEGFC</i>  | *601528 | Lymphatic malformation 4                                                                                                                                                                                                                                                                                                       | #615907 |                                                                                                                                                                     |
|  | <i>WDR13</i>  | *300512 | KO mice increase pancreatic islet mass and higher serum insulin levels, and are mildly obese                                                                                                                                                                                                                                   | /       | <a href="https://www.genecards.org/cgi-bin/carddisp.pl?geneWDR13&amp;keywords=WDR13">https://www.genecards.org/cgi-bin/carddisp.pl?geneWDR13&amp;keywords=WDR13</a> |

|  |                 |         |                                                                                                                                                                                                                                                                                                                                |         |                                                                                                                                                                           |
|--|-----------------|---------|--------------------------------------------------------------------------------------------------------------------------------------------------------------------------------------------------------------------------------------------------------------------------------------------------------------------------------|---------|---------------------------------------------------------------------------------------------------------------------------------------------------------------------------|
|  | <i>WNT10B</i>   | *601906 | Molecular switch for adipogenesis                                                                                                                                                                                                                                                                                              | /       | <a href="https://www.genecards.org/cgi-bin/carddisp.pl?gene=WNT10B&amp;keywords=WNT10B">https://www.genecards.org/cgi-bin/carddisp.pl?gene=WNT10B&amp;keywords=WNT10B</a> |
|  | <i>WNT11</i>    | *603699 | Obesity-induced adipose tissue inflammation and metabolic dysfunction promotion                                                                                                                                                                                                                                                | /       | doi:10.2337/db14-1164                                                                                                                                                     |
|  | <i>WNT4</i>     | *603490 | Adipocyte differentiation promotion                                                                                                                                                                                                                                                                                            | /       | doi:10.1016/j.febslet.2008.08.011                                                                                                                                         |
|  | <i>YWHAZ</i>    | *601288 | Insulin sensitivity regulation                                                                                                                                                                                                                                                                                                 | /       | <a href="https://www.genecards.org/cgi-bin/carddisp.pl?gene=YWHAZ&amp;keywords=YWHAZ">https://www.genecards.org/cgi-bin/carddisp.pl?gene=YWHAZ&amp;keywords=YWHAZ</a>     |
|  | <i>ZEB1</i>     | *189909 | Impaired glucose tolerance, increased body weight, circulating adiponectin level, circulating corticosterone level, circulating free fatty acids level, circulating insulin level, circulating leptin level, circulating triglyceride level, percent body fat/body weight, increased total body fat amount, insulin resistance | /       | MGI:1344313                                                                                                                                                               |
|  | <i>ZMPSTE24</i> | *606480 | Mandibuloacral dysplasia with type B lipodystrophy                                                                                                                                                                                                                                                                             | #608612 |                                                                                                                                                                           |
|  | <i>ZNF423</i>   | *604557 | Adipogenic commitment control in mice, dysregulation in human hypertrophic obesity                                                                                                                                                                                                                                             | /       | doi:10.1007/s00125-017-4471-4                                                                                                                                             |
|  | <i>ZNRF3</i>    | *612062 | Inhibition of Wnt/ $\beta$ -catenin signaling,                                                                                                                                                                                                                                                                                 | /       | doi:10.3389/fphys.2018.00792                                                                                                                                              |

**Supplementary Table S1.** Genes analyzed in the present study. The genes are subdivided in three subpanels: isolated lipedema, syndromic subcutaneous fat tissue accumulation, differential diagnosis, candidate genes. ALMS = Alstrom syndrome; BBS = Bardet-Biedl syndrome; BDVS = Blakemore-Durmaz-Vasileiou syndrome; BFLS = Borjeson-Forssman-Lehmann syndrome; CDLS = Cornelia de Lange syndrome; CGL = congenital generalized lipodystrophy; CRPT = Carpenter syndrome; FPLD = Familial partial lipodystrophy; HHF = Familial hyperinsulinemic hypoglycemia; HKLLS = Hennekam lymphangiectasia-lymphedema syndrome; LMPHM = Lymphatic malformation; LPHDST = Lymphedema-distichiasis; MODY = Maturity-onset diabetes of the young; PPNAD = primary pigmented nodular adrenocortical disease; PHP = Pseudohypoparathyroidism; WBS = Williams-Beuren syndrome.
